# Supplementary material
Source: MDPI journal article supplement (https://www.mdpi.com/2079-6412/9/6/390)
Supplement: s1 [file s1]

# Supplementary Materials: First Principles Study of Gas Molecules Adsorption on Monolayered $\beta$ -SnSe

Tianhan Liu <sup>1</sup>, Hongbo Qin <sup>1,\*</sup>, Daoguo Yang <sup>1</sup> and Guoqi Zhang <sup>1,2</sup>

<sup>1</sup> School of Mechanical and Electronic Engineering, Guilin University of Electronic Technology, Guilin 541004, China; 1801302029@mails.guet.edu.cn (T.L.); d.g.yang@guet.edu.cn (D.Y.); g.q.zhang@tudelft.nl (G.Z.)

<sup>2</sup> EEMCS Faculty, Delft University of Technology, 2628 Delft, The Netherlands

\* Correspondence: qinhb@guet.edu.cn; Tel.: +86-773-2290108

Received: 30 April 2019; Accepted: 13 June 2019; Published: 17 June 2019

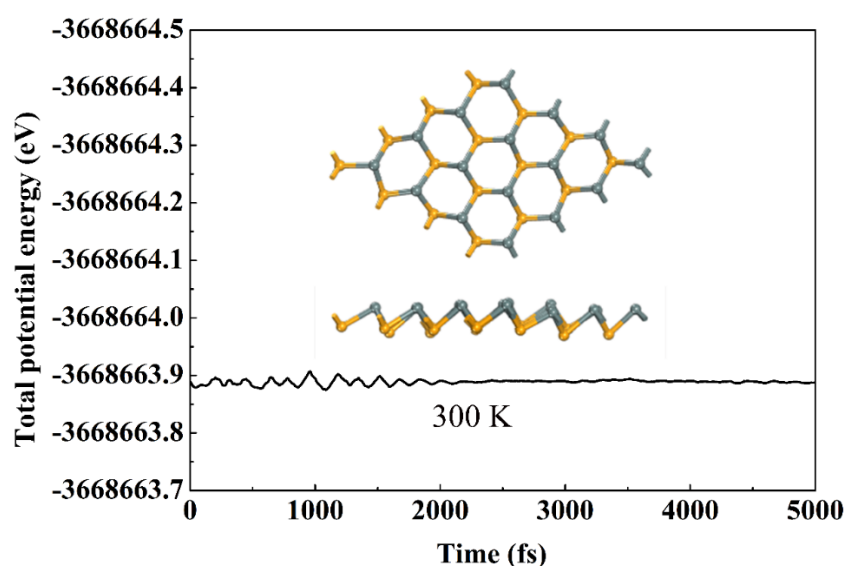

**Figure S1.** Total potential energy of pristine monolayer SnSe at 300 K within 5 ps during the first-principles molecular dynamics (MD) simulation.

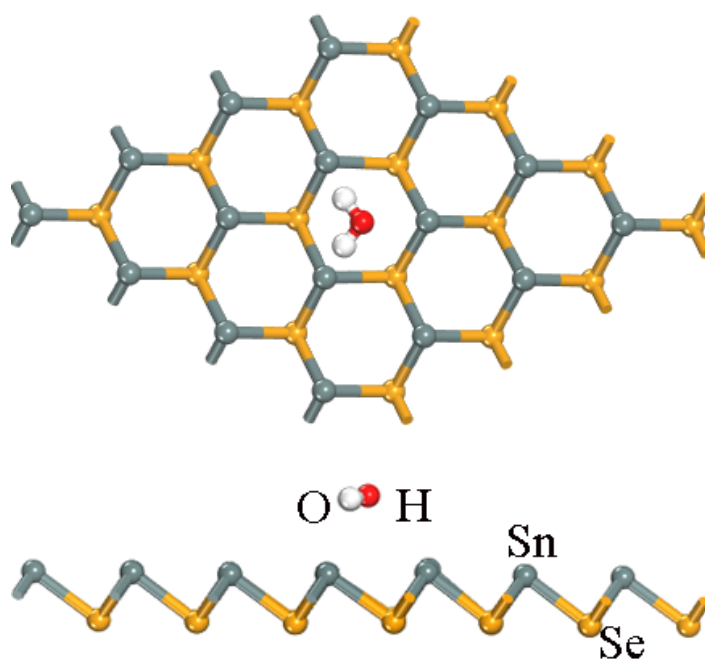

**Figure S2.** The most stable site of structural optimizations for H<sub>2</sub>O on  $\beta$ -SnSe layer is presented.

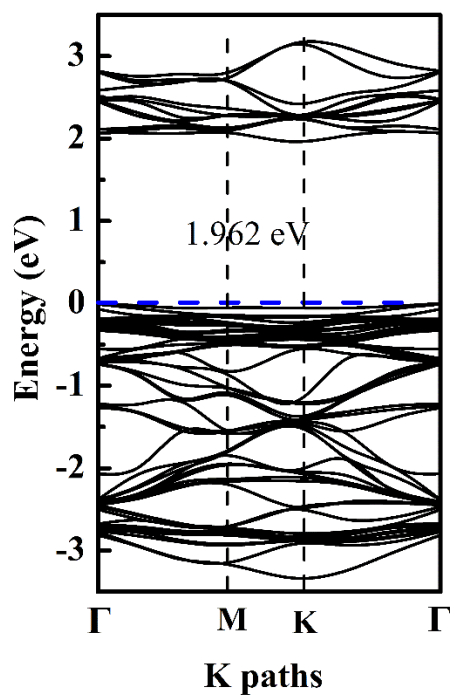

**Figure S3.** Band structure of the monolayered  $\beta$ -SnSe with the  $\text{H}_2\text{O}$  molecules.

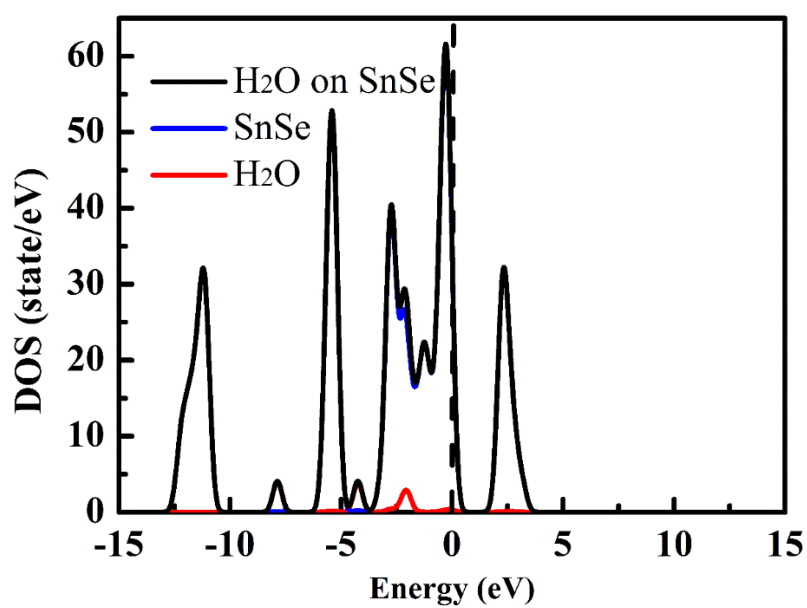

**Figure S4.** Total DOSs of the  $\text{H}_2\text{O}$  on SnSe (black curve), the projected DOS of SnSe (red curve), and the adsorbate molecules (blue curve) for  $\text{H}_2\text{O}$  on SnSe monolayer. The  $E_f$  is set to zero, as illustrated by black dotted line.

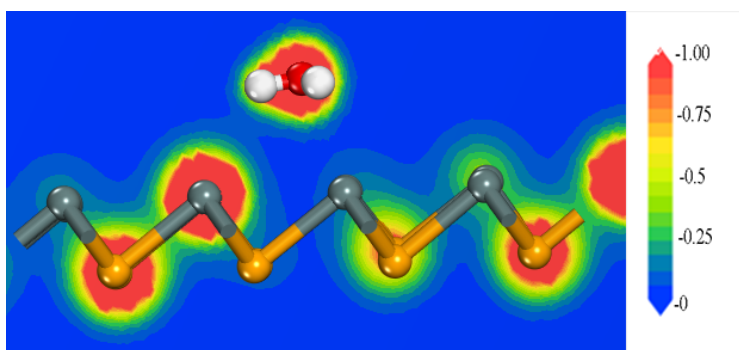

**Figure S5.** The slice of charge densities for the  $\beta$ -SnSe monolayer with the  $\text{H}_2\text{O}$  molecule. The value of electron densities ranges between 0 and  $1.00 \text{ e}/\text{\AA}^3$ .
